# Supplementary material for: Circulating miRNAs as Potential Biomarkers for Celiac Disease Development
Source: PubMed Central journal article supplement (PMC8688806; doi:10.3389/fimmu.2021.734763), 2021-12-07

hsa-miR-3605-3p

A

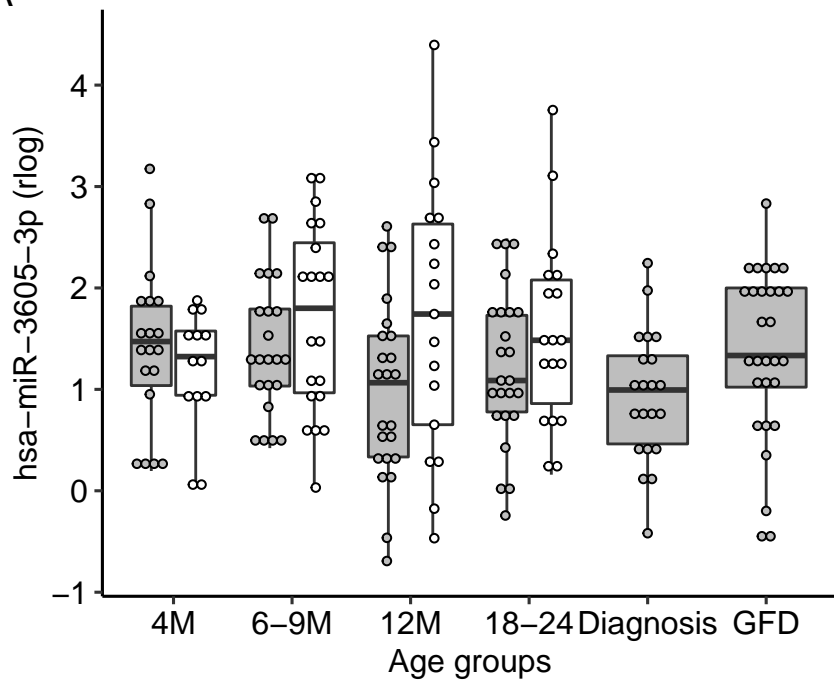

B

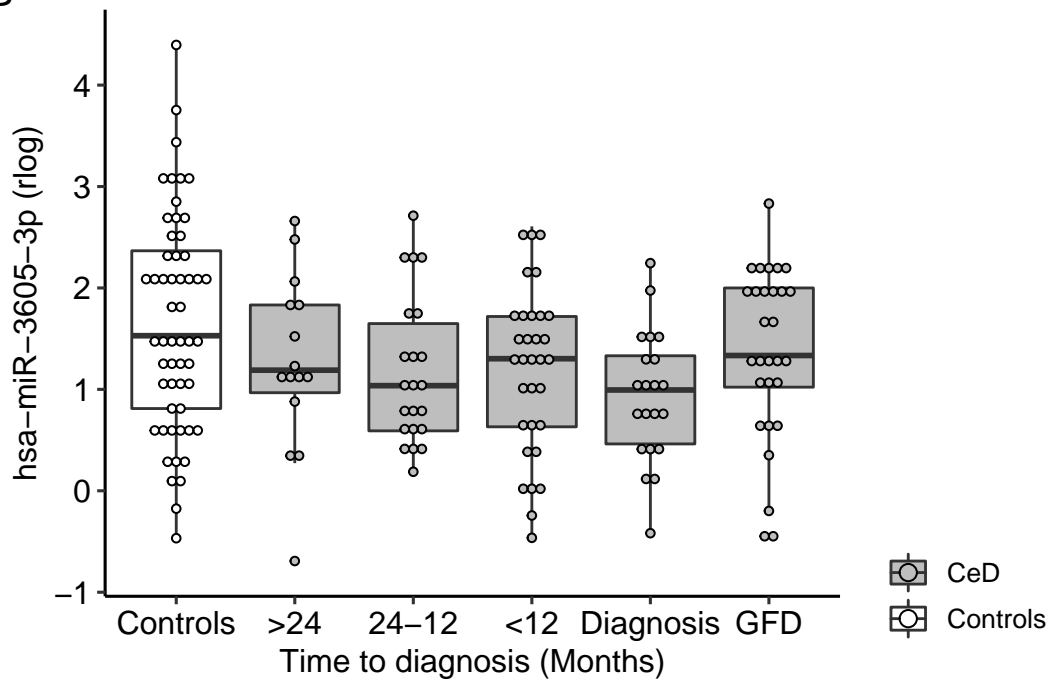

C

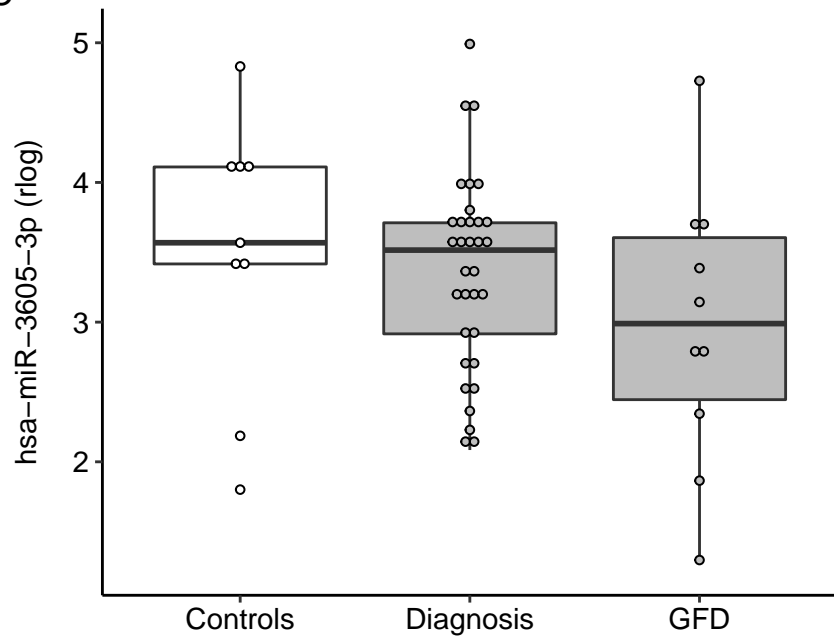

D

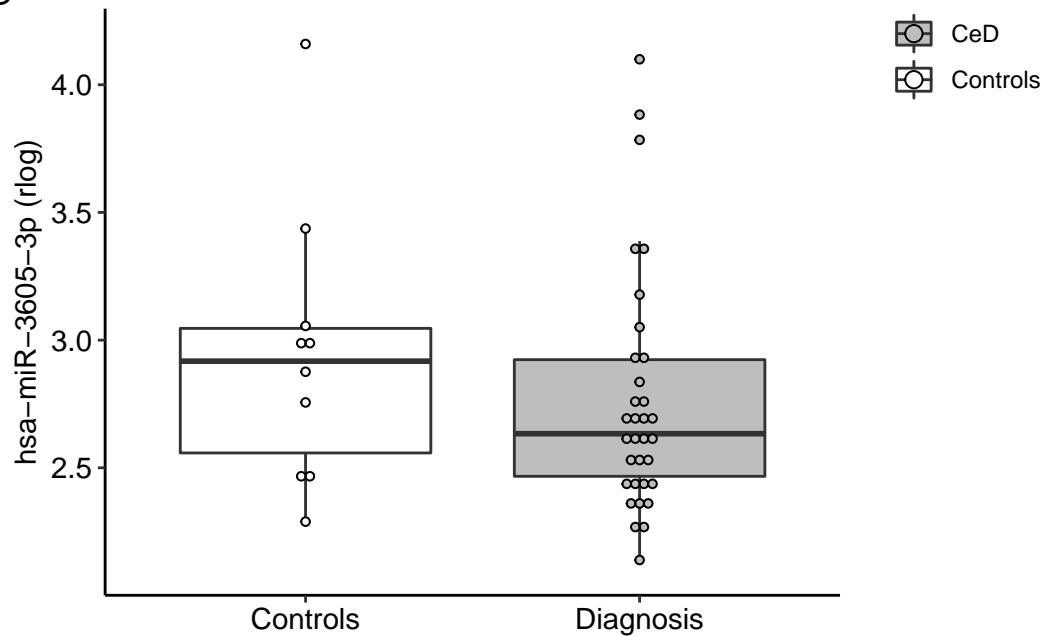

hsa-let-7e-5p

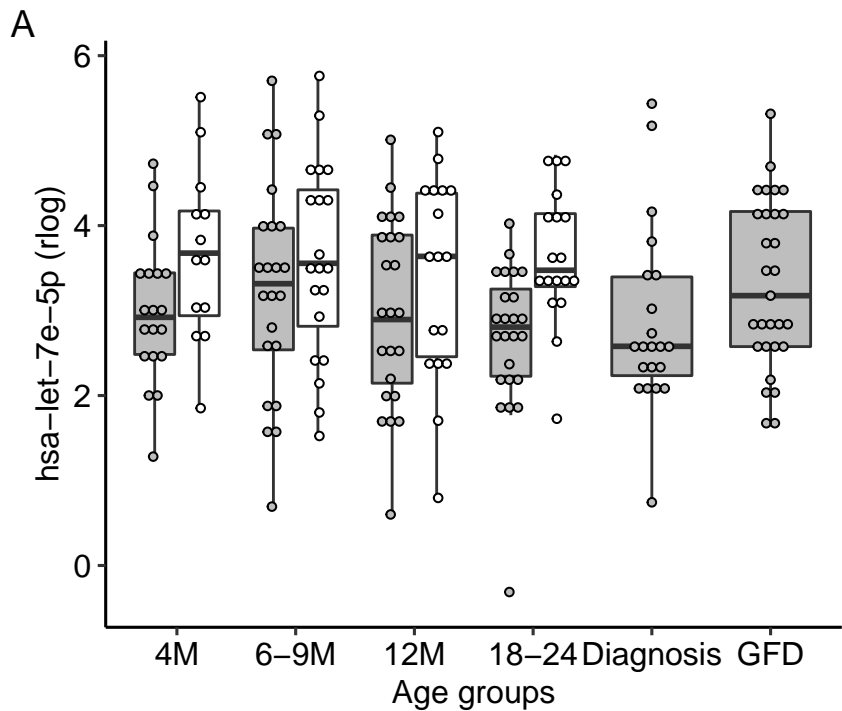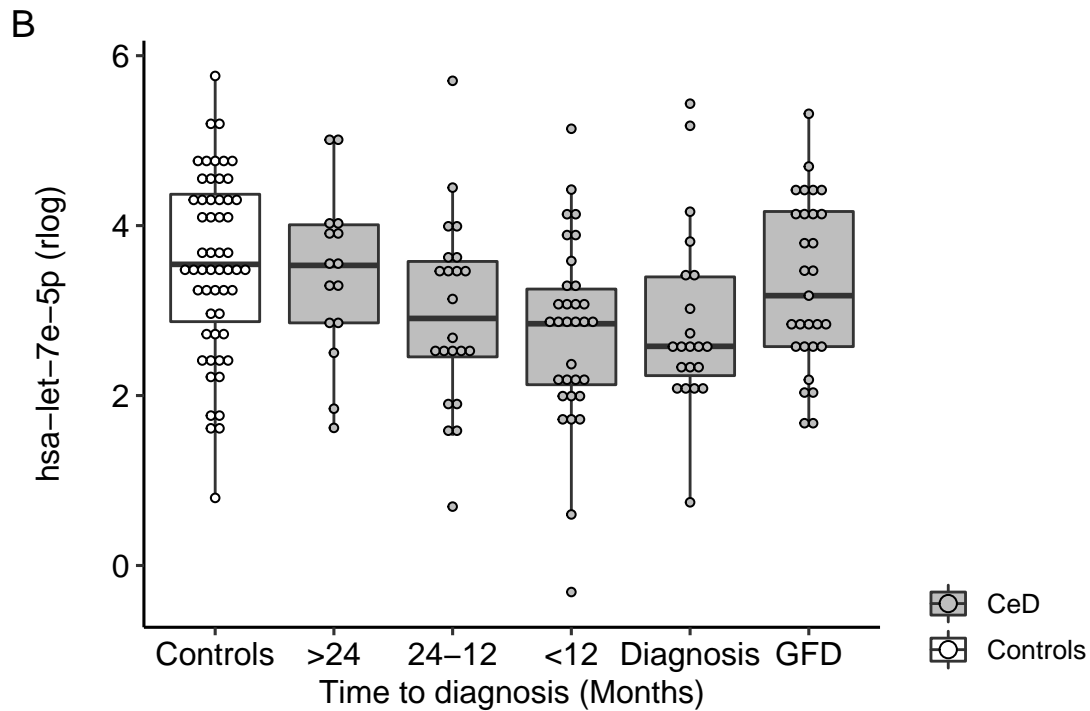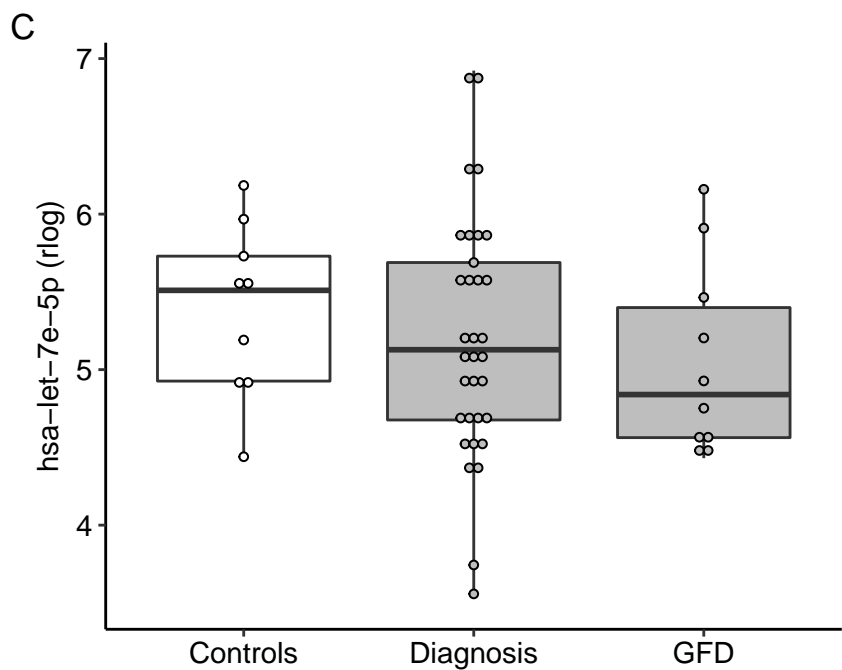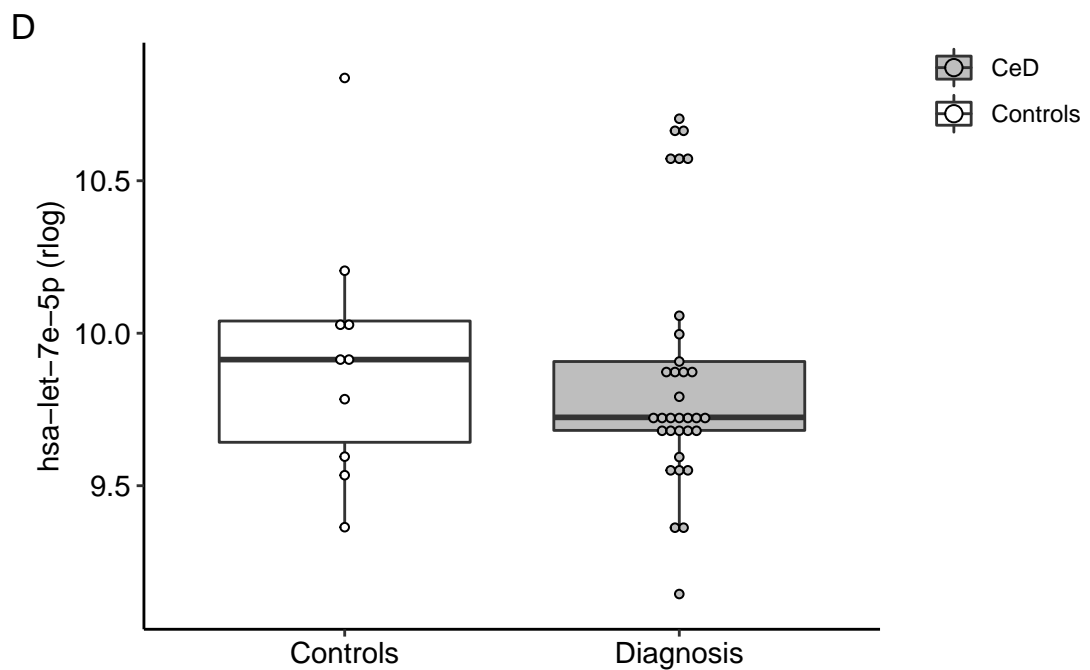

hsa-let-7d-3p

A

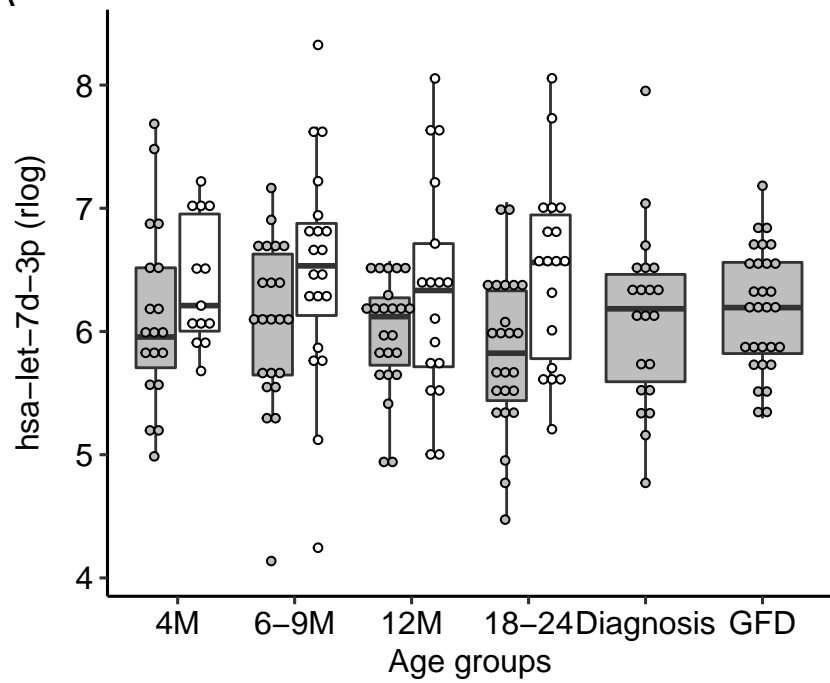

B

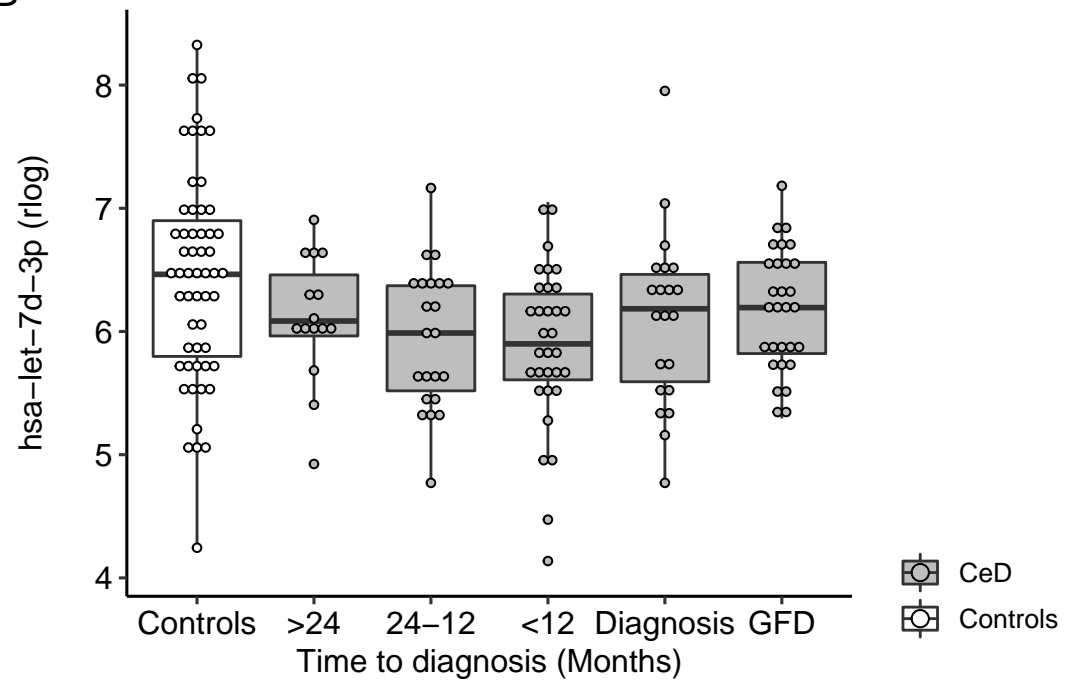

C

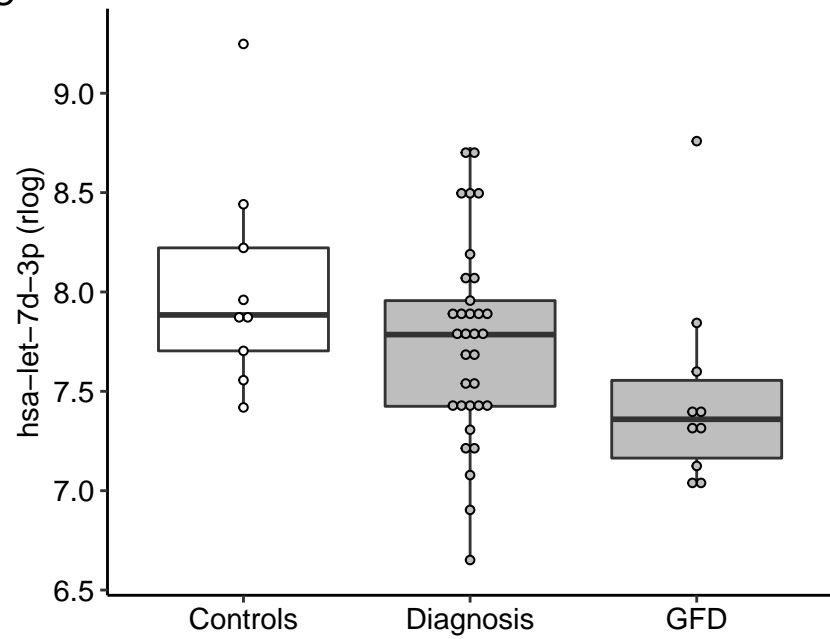

D

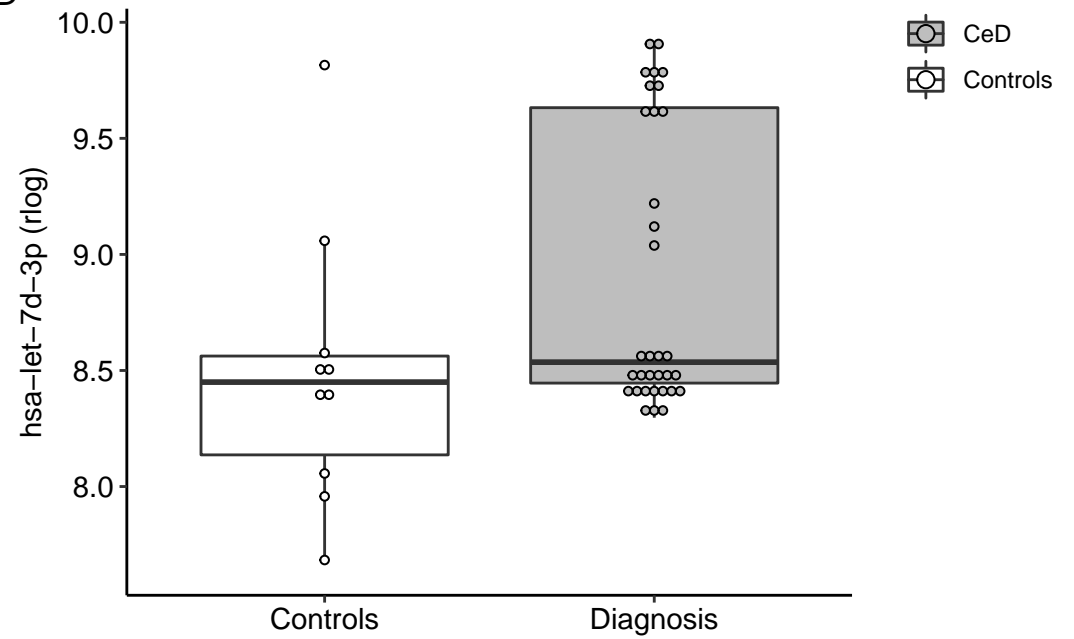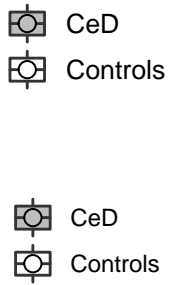

hsa-miR-486-3p

A

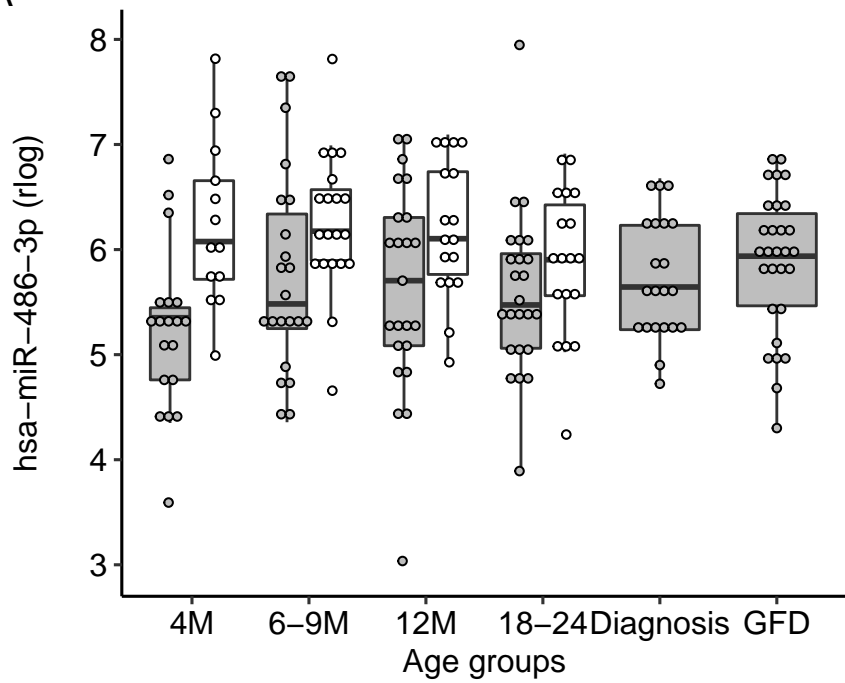

B

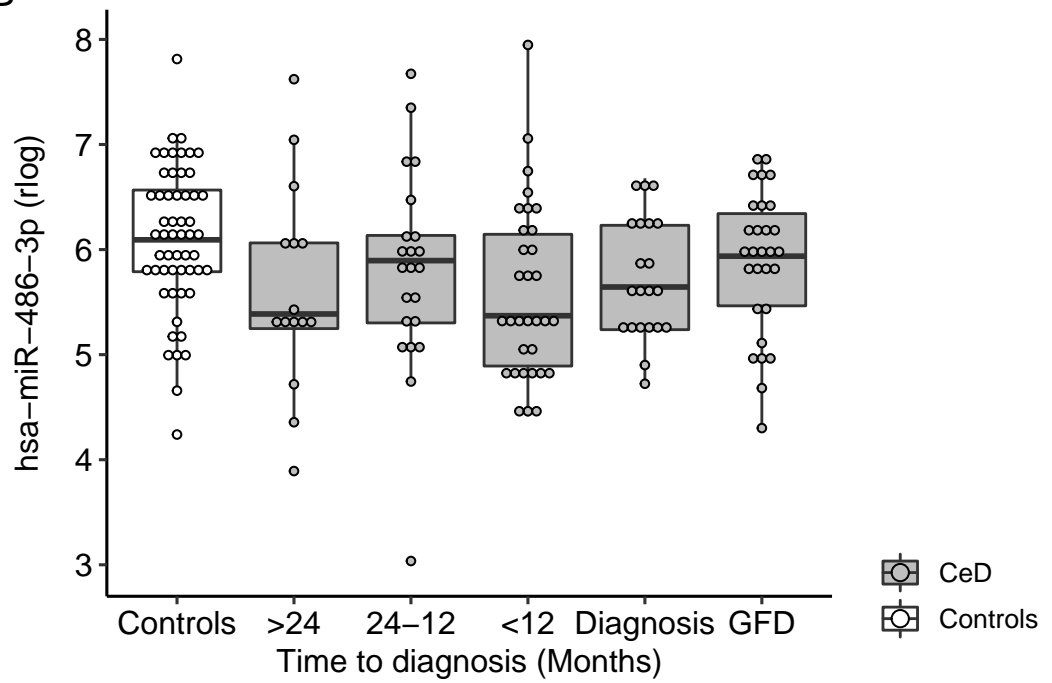

C

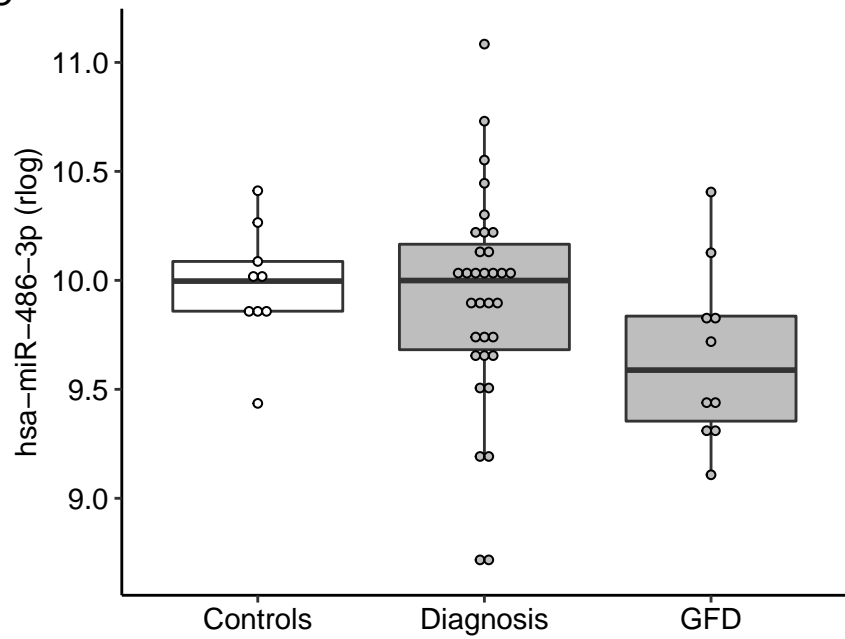

D

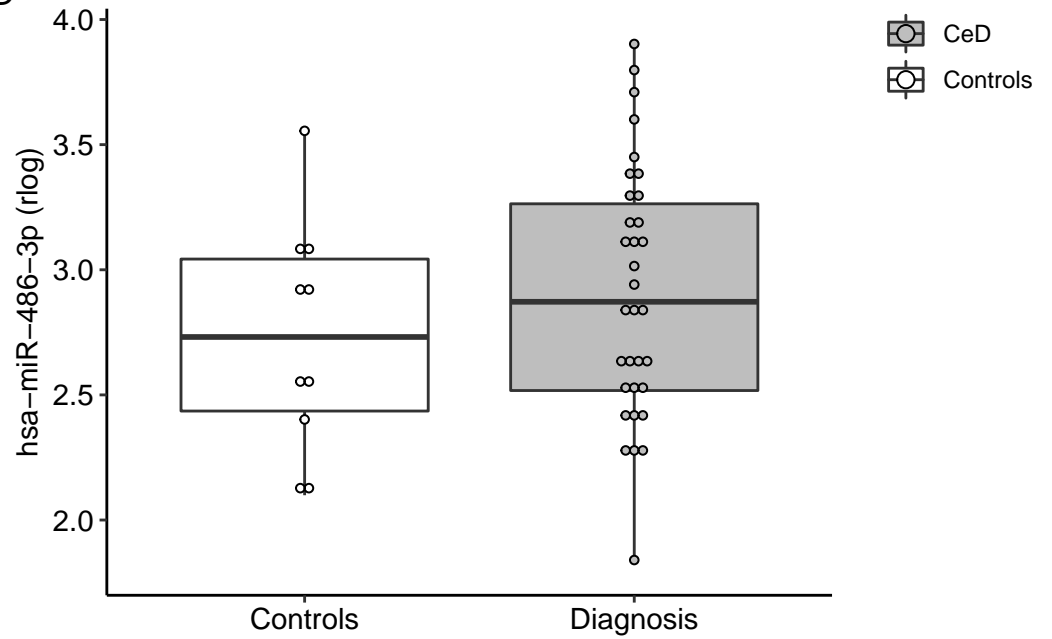

hsa-miR-144-3p

A

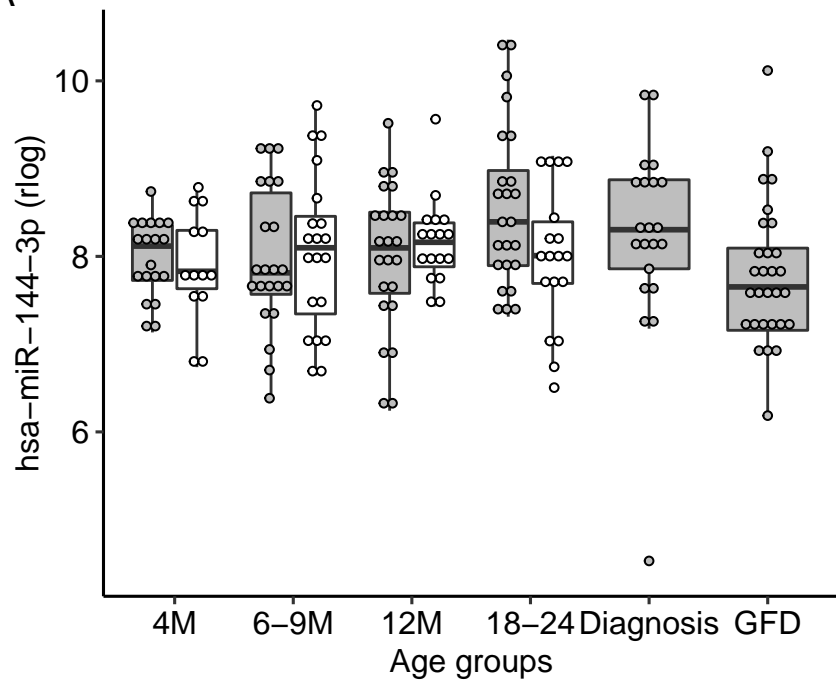

B

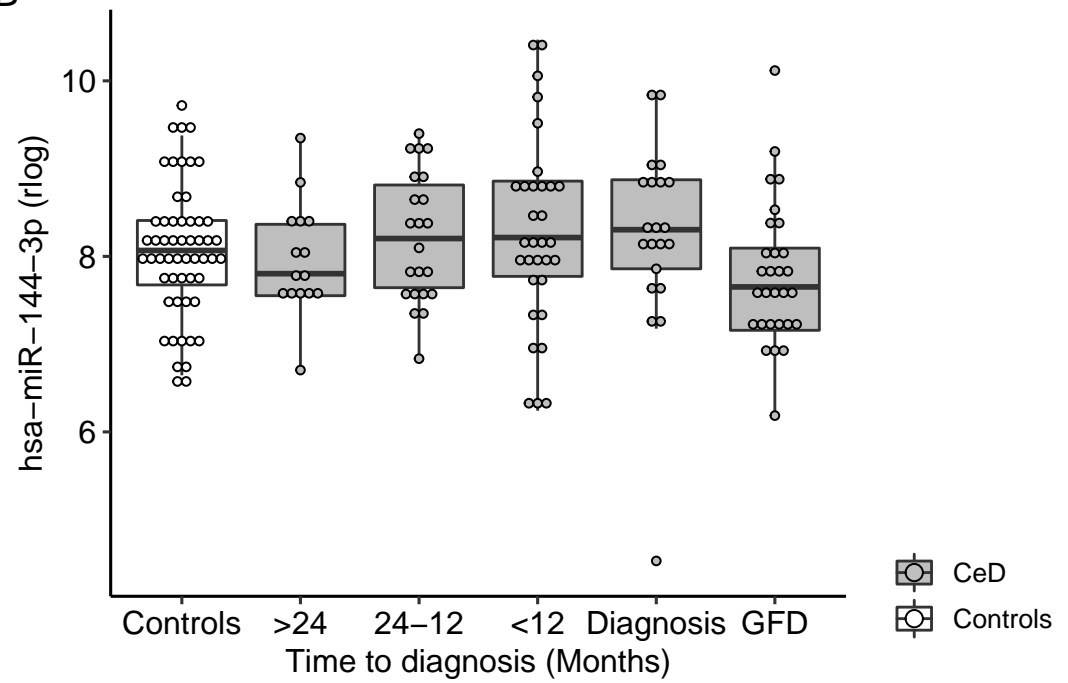

C

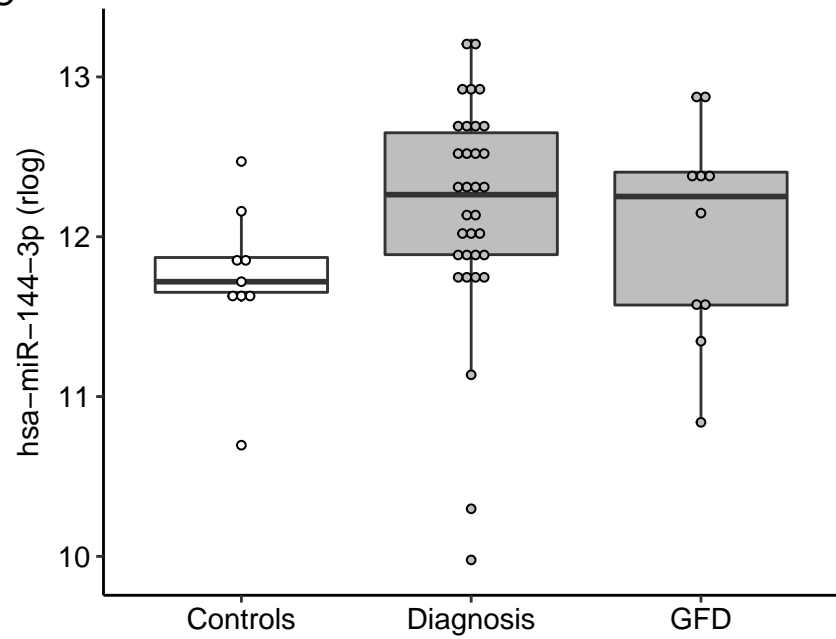

D

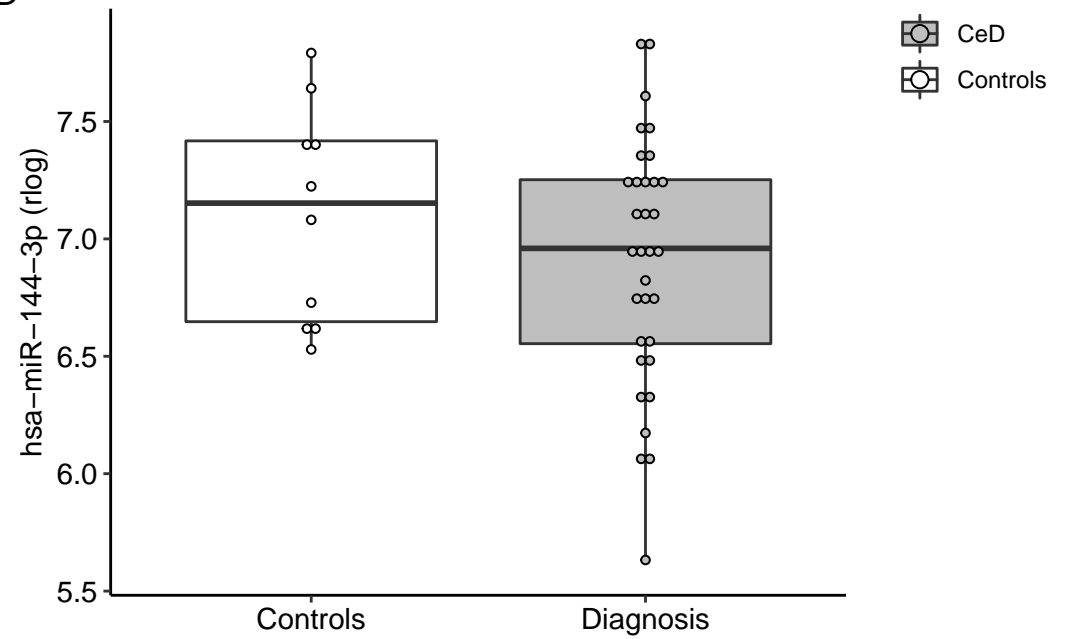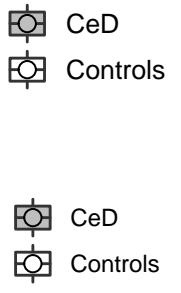

hsa-miR-500a-3p

A

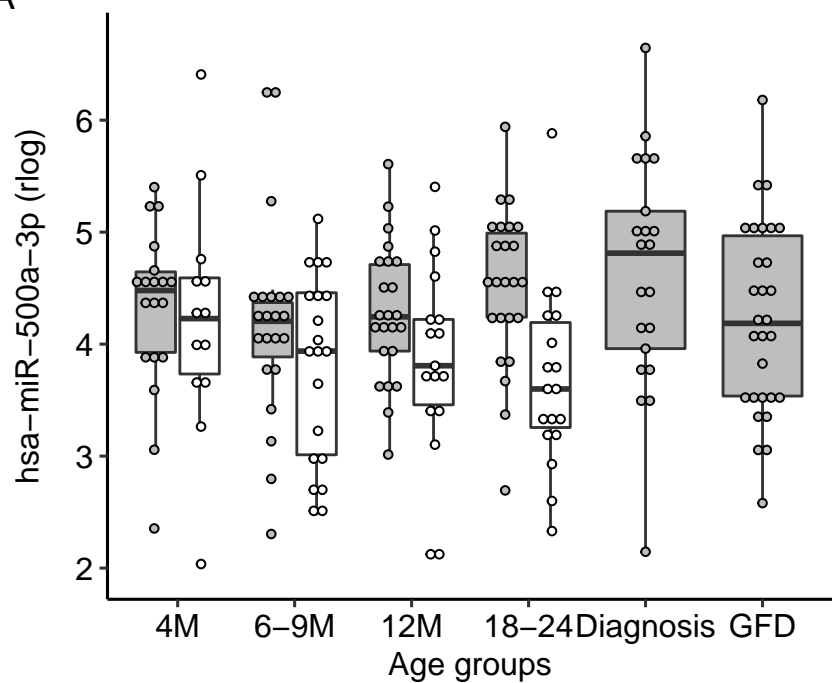

B

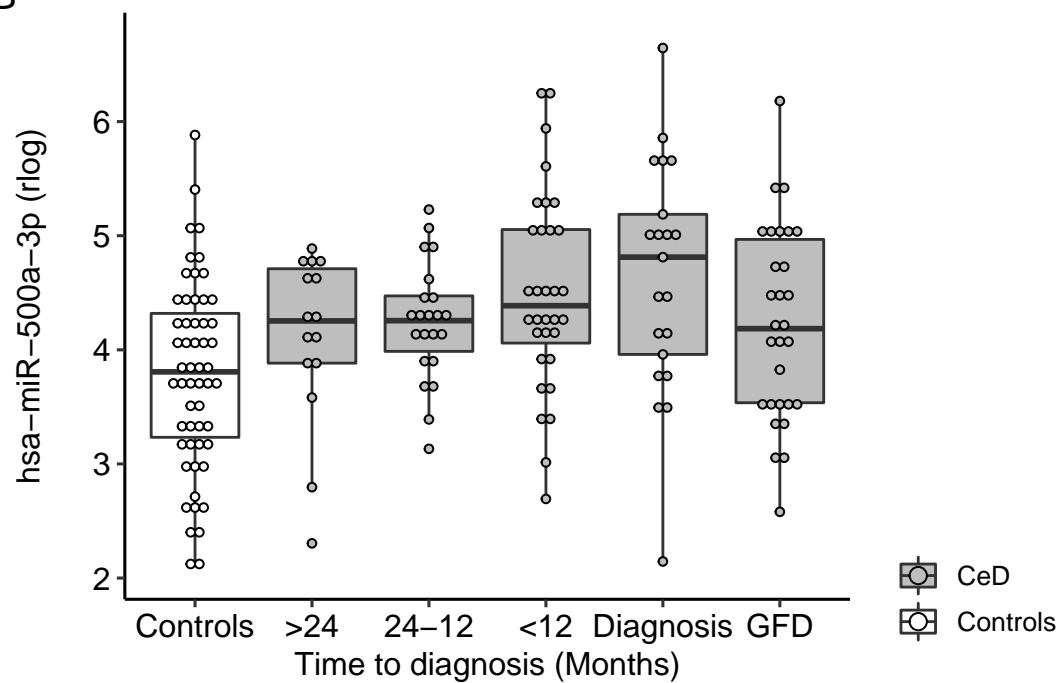

C

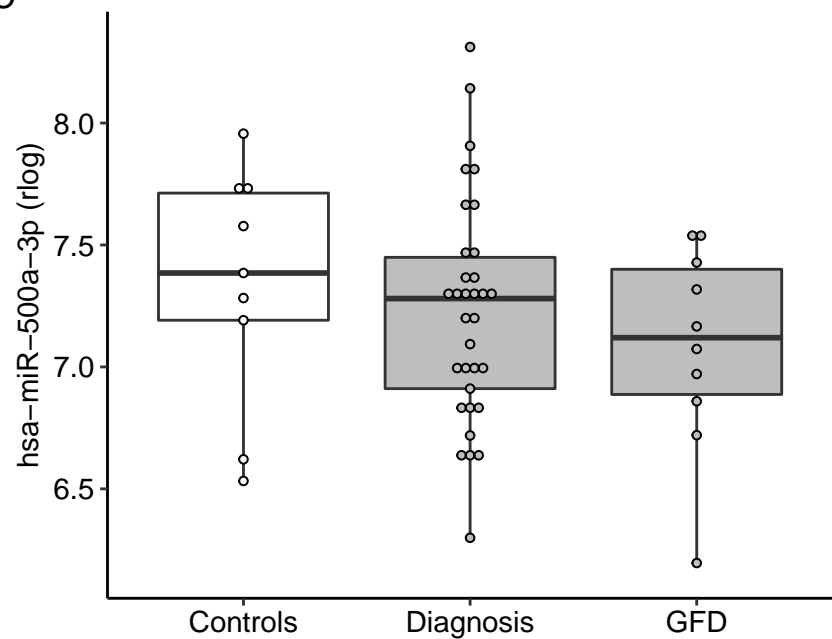

D

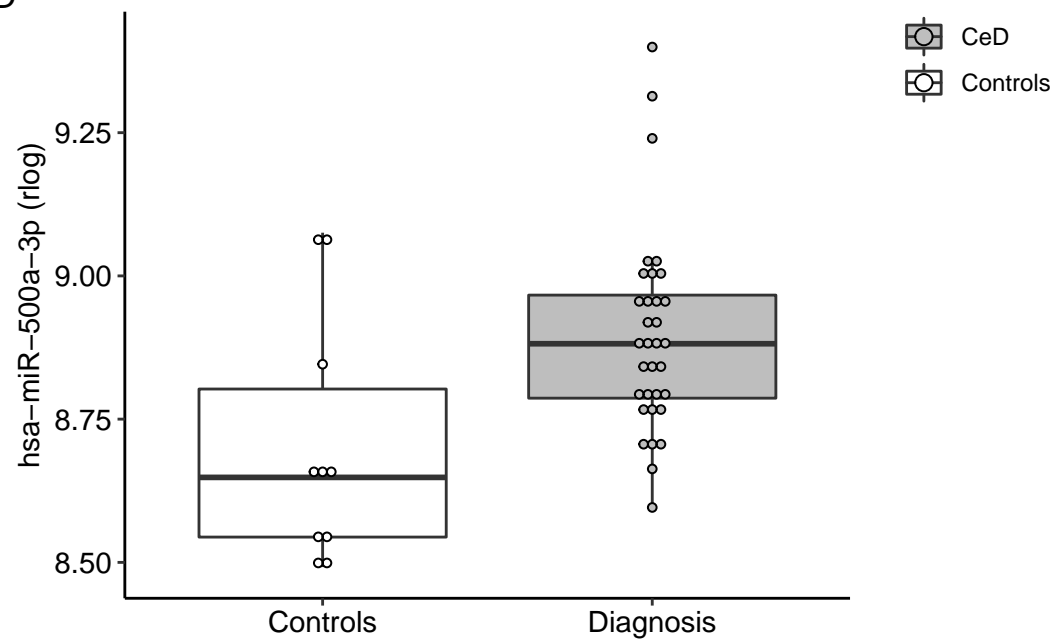

hsa-miR-374a-5p

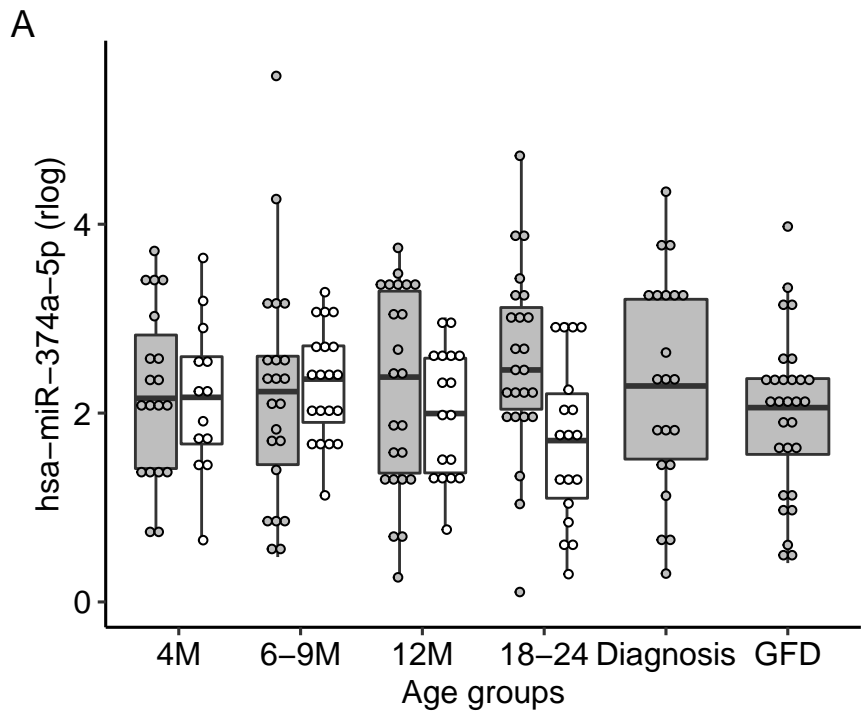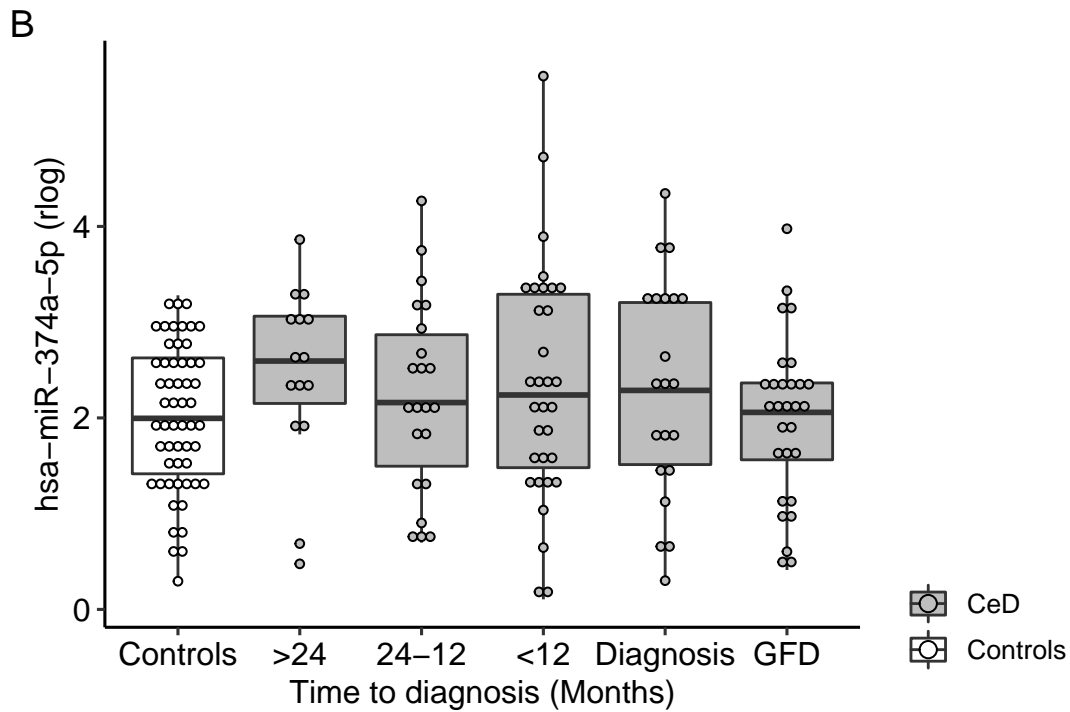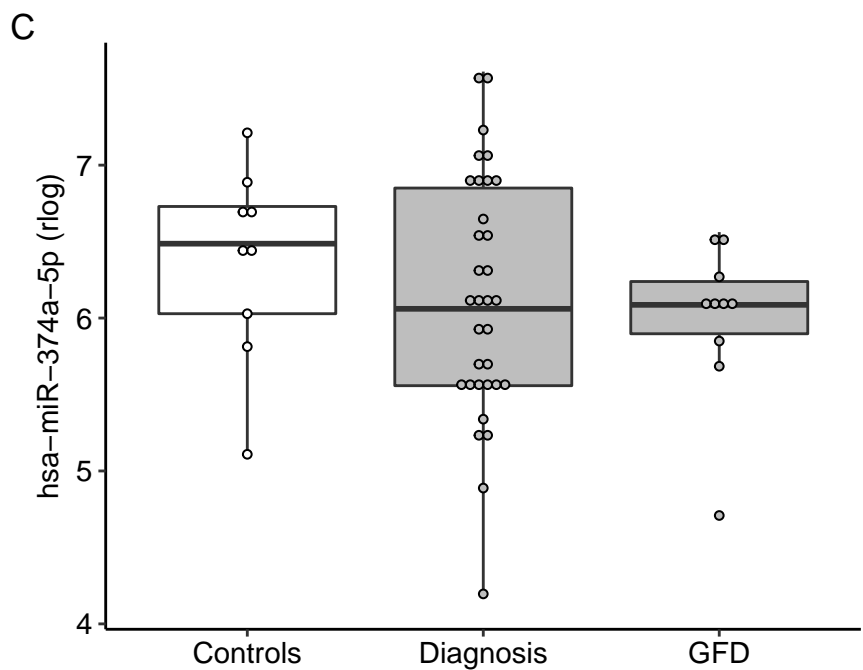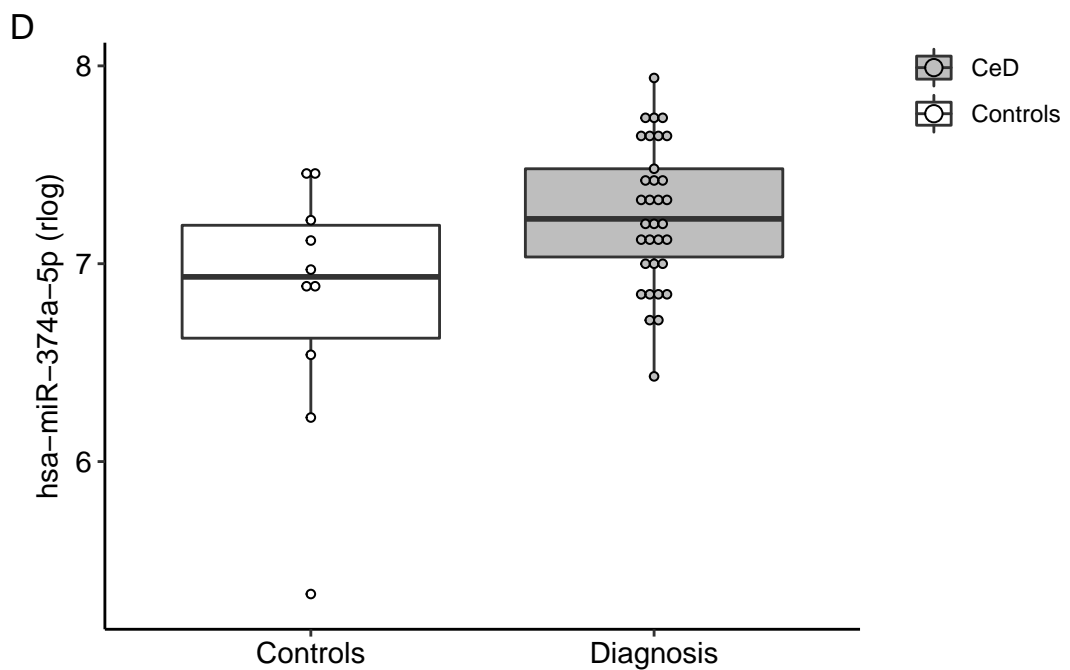

hsa-miR-21-3p

A

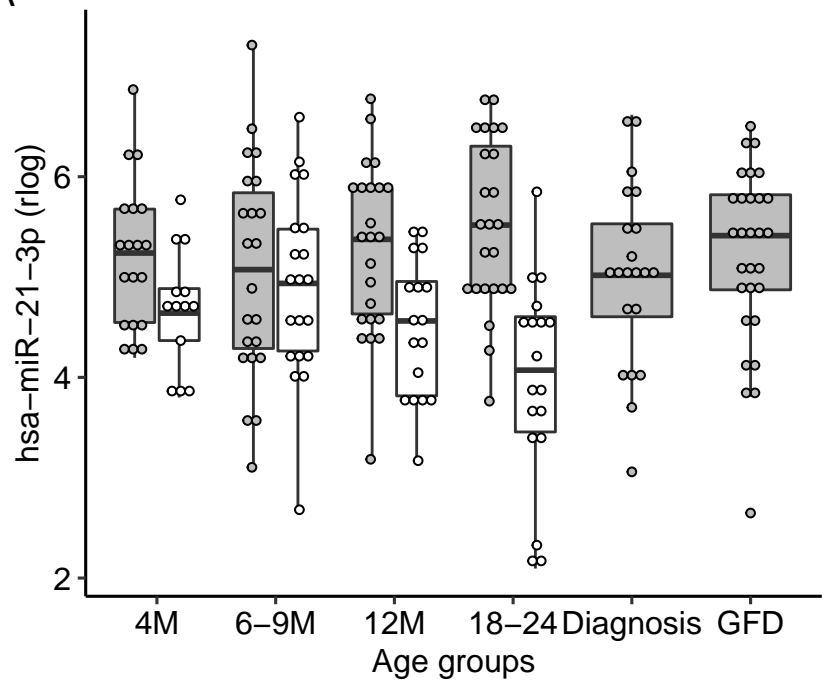

B

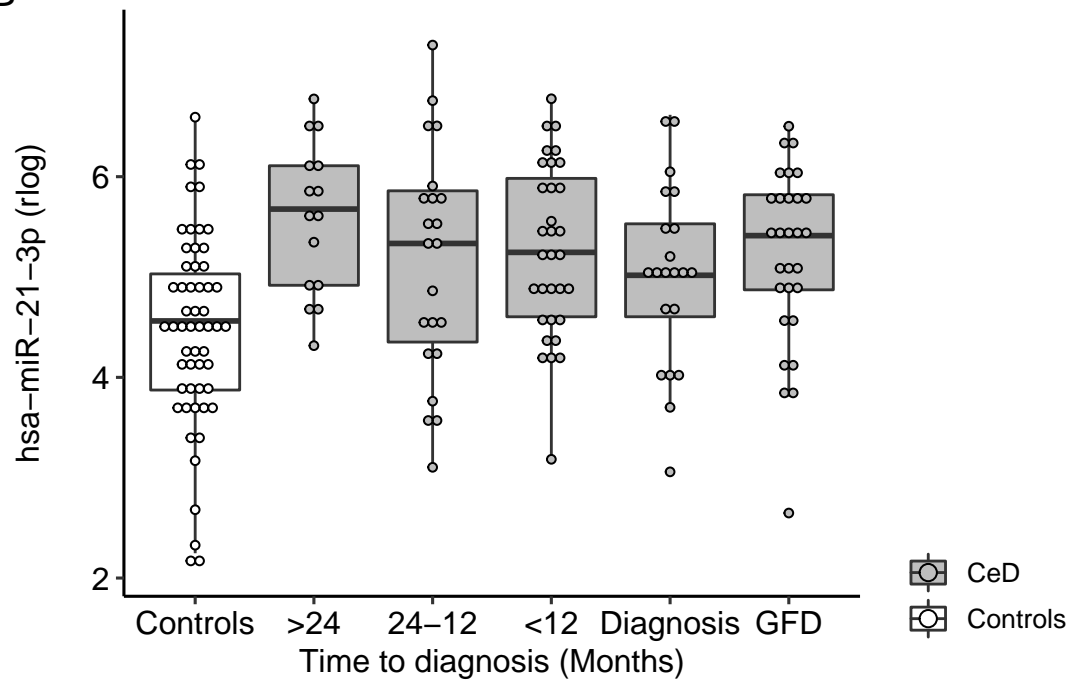

C

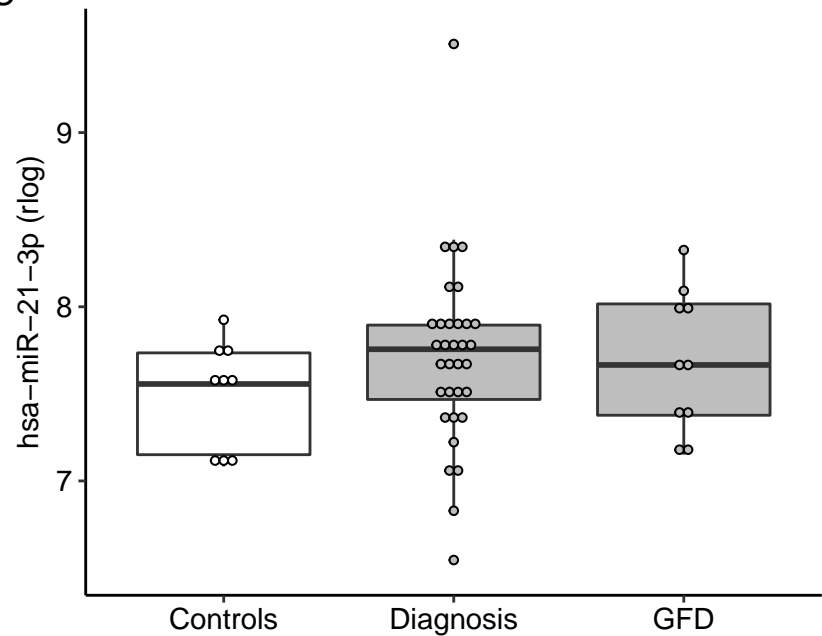

D

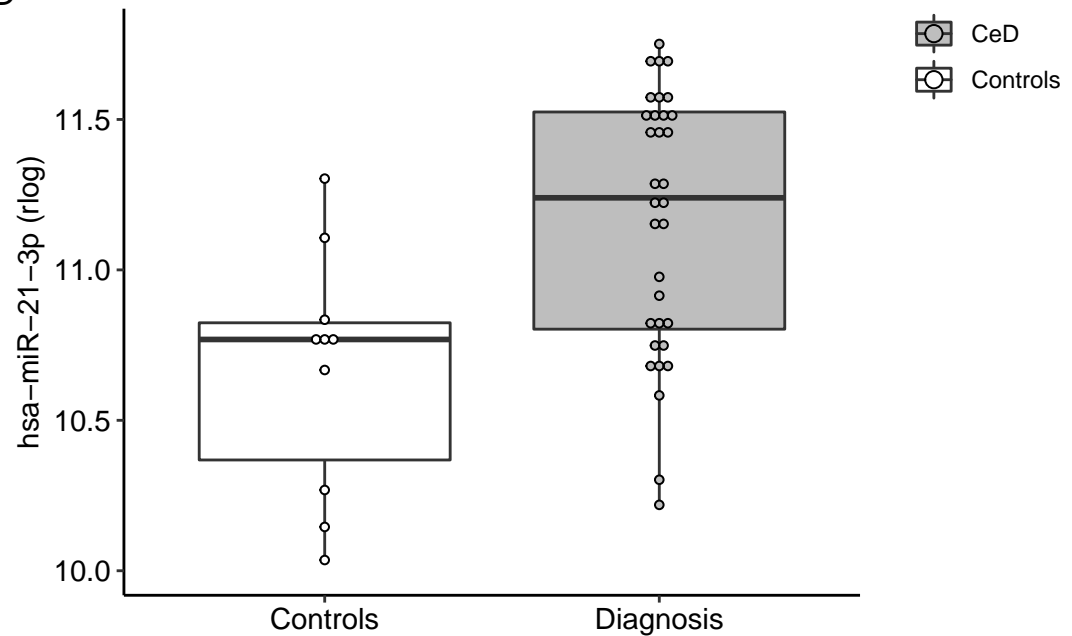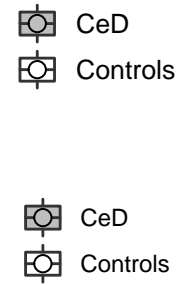

Supplement: DataSheet_2.pdf [file DataSheet_2.pdf]
